# Supplementary material
Source: MDPI journal article supplement (https://www.mdpi.com/2073-4441/9/7/513)
Supplement: s1 [file s1]

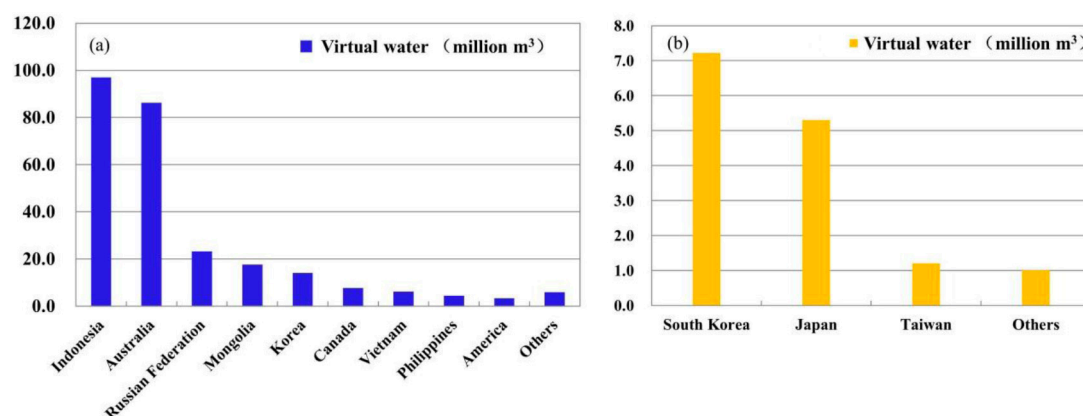

**Supplement Figure 1.** The virtual water embedded in the coal trade in 2014 in China (million m<sup>3</sup>): (a) Import and (b) Export. Countries with virtual water of more than 1million m<sup>3</sup> are listed in the figure.

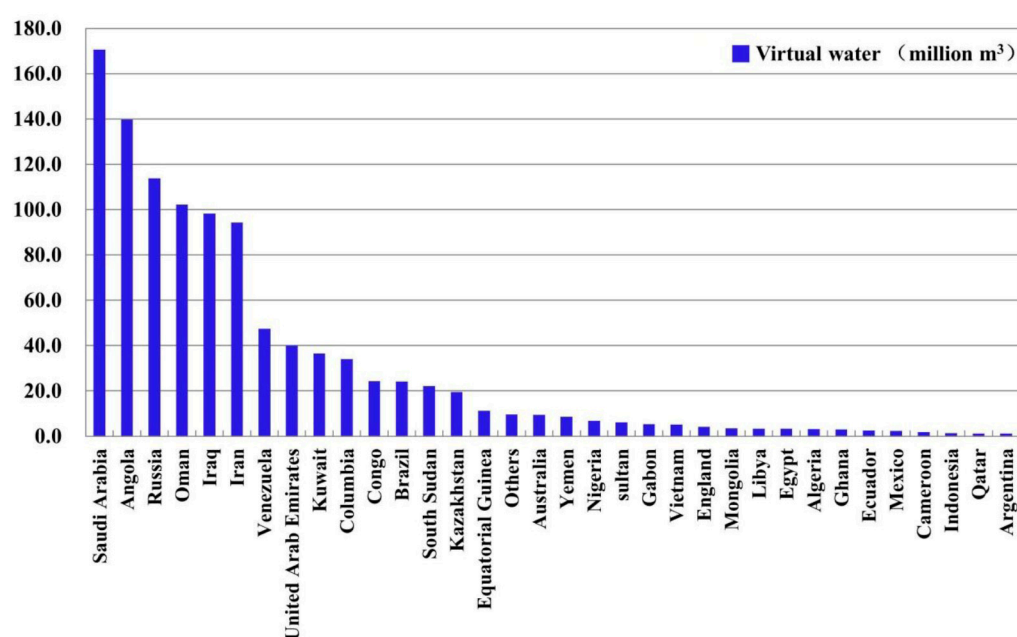

**Supplement Figure 2.** The virtual water embedded in the import oil trade in2014 in China (million m<sup>3</sup>). Countries with virtual water of more than 1million m<sup>3</sup> are listed in the figure. Note: The virtual water embedded in the export oil trade in2014 was less than 1million m<sup>3</sup>, so these values are not listed here.

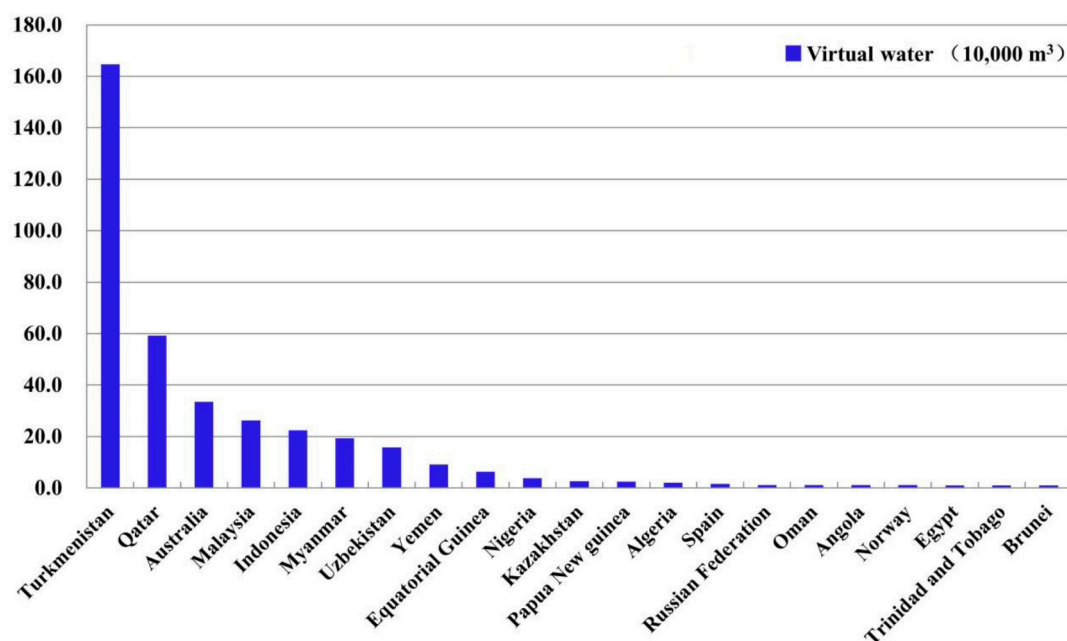

**Supplement Figure 3.** The virtual water embedded in the import gas trade in 2014 in China (million m<sup>3</sup>). Countries with virtual water of more than 10,000 m<sup>3</sup> are listed in the figure. Note: Gas was mainly exported to Hong Kong and Macao in 2014, so these values are not listed here.

**Supplement Table 1.** The WFEP for fossil energy in China from 2001 to 2014 (million m<sup>3</sup>/year).

| Year | WFEP     |       |     |          | WFES     |         |      |          |
|------|----------|-------|-----|----------|----------|---------|------|----------|
|      | Coal     | Oil   | Gas | Total    | Coal     | Oil     | Gas  | Total    |
| 2001 | 3,776.2  | 146.9 | 1.9 | 3,925.1  | 3,547.4  | 378.2   | 1.7  | 3,927.3  |
| 2002 | 3,978.6  | 149.7 | 2.1 | 4,130.4  | 3,773.6  | 381.3   | 1.9  | 4,156.8  |
| 2003 | 4,708.7  | 152.0 | 2.2 | 4,862.9  | 4,477.5  | 457.5   | 2.1  | 4,937.2  |
| 2004 | 5,447.0  | 157.6 | 2.6 | 5,607.3  | 5,241.6  | 574.4   | 2.5  | 5,818.5  |
| 2005 | 6,069.4  | 162.5 | 3.1 | 6,235.1  | 5,909.3  | 591.1   | 2.9  | 6,503.3  |
| 2006 | 6,594.4  | 165.6 | 3.7 | 6,763.7  | 6,466.9  | 658.8   | 3.6  | 7,129.3  |
| 2007 | 7,082.4  | 167.0 | 4.4 | 7,253.8  | 6,993.0  | 724.2   | 4.7  | 7,721.7  |
| 2008 | 7,450.7  | 170.7 | 5.1 | 7,626.5  | 7,373.6  | 781.6   | 5.2  | 8,160.4  |
| 2009 | 7,994.6  | 169.8 | 5.4 | 8,169.8  | 8,057.4  | 865.2   | 5.7  | 8,928.3  |
| 2010 | 8,798.1  | 181.9 | 6.1 | 8,986.1  | 8,916.0  | 996.1   | 6.8  | 9,919.0  |
| 2011 | 9,660.4  | 181.8 | 6.7 | 9,848.8  | 9,825.5  | 1,051.7 | 8.4  | 10,885.7 |
| 2012 | 10,124.0 | 185.9 | 7.0 | 10,316.9 | 10,363.3 | 1,115.2 | 9.5  | 11,488.0 |
| 2013 | 10,198.9 | 188.1 | 7.6 | 10,394.7 | 10,478.0 | 1,155.0 | 10.8 | 11,643.7 |
| 2014 | 9,941.3  | 189.5 | 8.2 | 10,138.9 | 10,192.2 | 1,248.7 | 11.8 | 11,452.8 |
